# Supplementary material for: Simultaneous binding of a cyclophane and classical intercalators to DNA: observation of FRET-mediated white light emission
Source: Royal Society of Chemistry journal article supplement (doi:10.1039/c5cp00208g), 2015-01-01
Supplement: c5cp00208g1.pdf [file c5cp00208g1.pdf]

## Supporting Information

### Simultaneous Binding of a Cyclophane and Classical Intercalators to DNA: Observation of FRET-mediated White Light Emission

Krishnankutty S. Sanju,<sup>a</sup> Shameel Thurakkal,<sup>a</sup> Prakash P. Neelakandan,<sup>a</sup> Joshy Joseph<sup>\*a</sup> and Danaboyina Ramaiah<sup>\*a,b</sup>

<sup>a</sup>*Photosciences and Photonics, Chemical Sciences and Technology Division*

*CSIR-National Institute for Interdisciplinary Science and Technology (CSIR-NIIST),  
Thiruvananthapuram 695 019, INDIA*

<sup>b</sup>*CSIR-North East Institute of Science and Technology (CSIR-NEIST), Jorhat, Assam, India.*

*Tel: +91 376 2372742; Fax: +91 376 2370011*

*E-mail: rama@niist.res.in or d.ramaiah@gmail.com*

| Sl. No. | CONTENTS                                                                                                                        | Page No. |
|---------|---------------------------------------------------------------------------------------------------------------------------------|----------|
| 1.      | Fig. S1 showing the absorption and excitation spectra of CP in presence of DNA                                                  | S2       |
| 2.      | Fig. S2 showing the absorption and emission changes of DNA-bound CP in presence of PI.                                          | S2       |
| 3.      | Fig. S3 showing the spectral overlap between CP excimer emission and PI absorption spectra and excitation spectrum.             | S3       |
| 4.      | Fig. S4 showing the spectral overlap between CP excimer emission and EHD absorption spectra.                                    | S3       |
| 5.      | Fig. S5 showing the TRES analysis of CP in presence of DNA and PI.                                                              | S4       |
| 6.      | Fig. S6 showing TRES analysis of CP in presence of DNA and EHD.                                                                 | S4       |
| 7.      | Fig. S7 showing fluorescence decay profile of CP in presence of DNA and EHD and TRES analysis of CP in presence of DNA and EHD. | S5       |

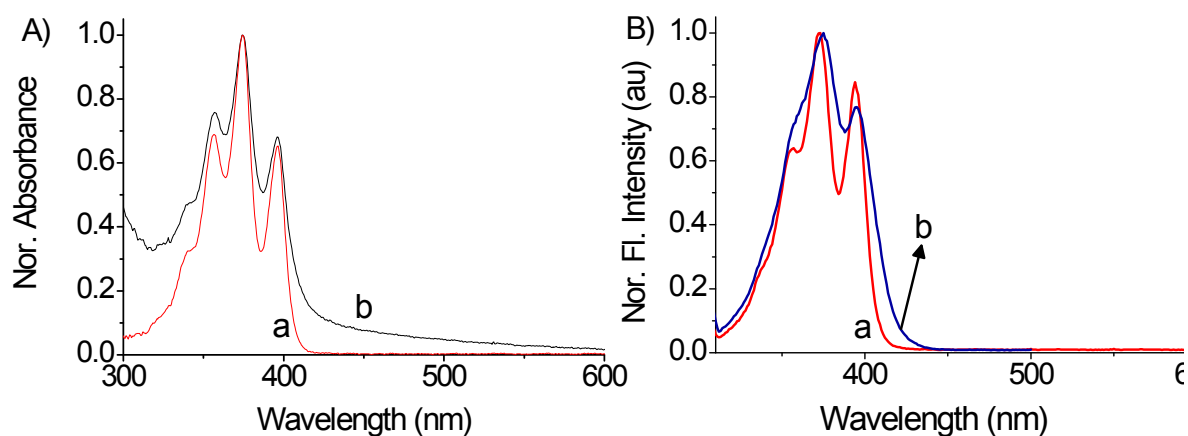

**Fig. S1** A) Normalized absorption spectra of **CP** (a) alone and (b) in presence of DNA in phosphate buffer (10 mM, pH 7.4) containing 2 mM NaCl. B) Normalized excitation spectra of **CP** (a) alone and (b) in presence of DNA in phosphate buffer (10 mM, pH 7.4) containing 2 mM NaCl when emission monitored at 550 nm. [**CP**], 16  $\mu$ M; [**DNA**], 38  $\mu$ M.

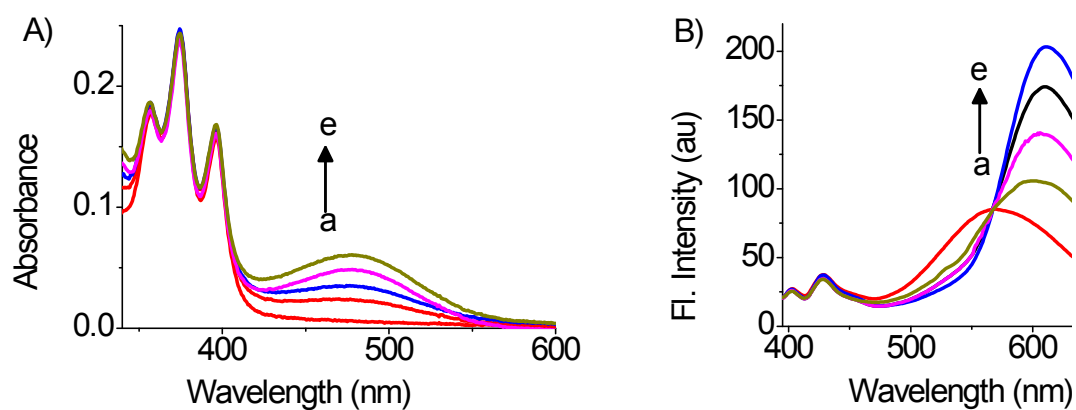

**Fig. S2** Changes in the A) absorption and B) emission spectrum of DNA-bound **CP** by the addition of **PI** in phosphate buffer (10 mM, pH 7.4) containing 2 mM NaCl. [**CP**], 16  $\mu$ M; [**DNA**], 38  $\mu$ M; [**PI**], (a) 0 and (e) 2  $\mu$ M. Excitation wavelength, 380 nm.

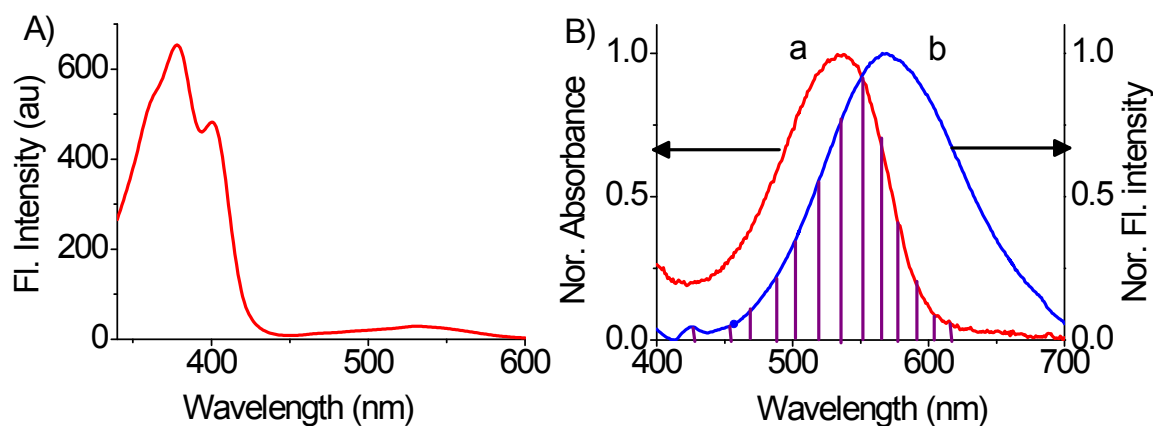

**Fig. S3** A) Excitation spectrum of a solution containing **CP** (16  $\mu\text{M}$ ) in presence of DNA (40  $\mu\text{M}$ ) and **PI** (2  $\mu\text{M}$ ) when emission monitored at 620 nm in phosphate buffer (10 mM, pH 7.4) containing 2 mM NaCl. B) Spectral overlap between normalized (a) absorption spectrum of **PI** and (b) emission spectrum of **CP** in presence of DNA in phosphate buffer (10 mM, pH 7.4) containing 2 mM NaCl. Excitation wavelength, 380 nm.

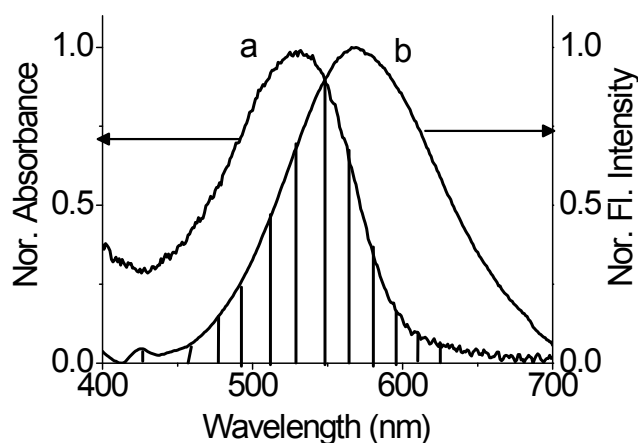

**Fig. S4** Spectral overlap between normalized (a) absorption spectrum of **EHD** and (b) emission spectrum of **CP** in presence of DNA in phosphate buffer (10 mM, pH 7.4) containing 2 mM NaCl. Excitation wavelength, 380 nm.

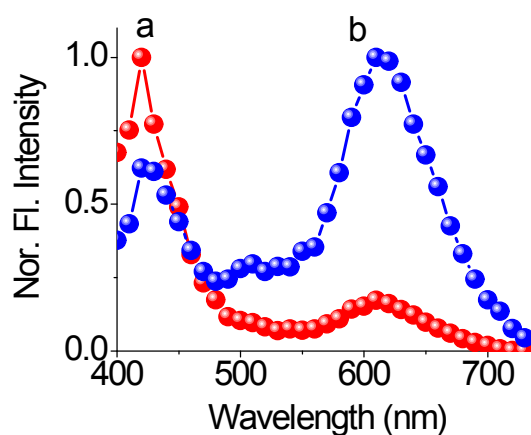

**Fig. S5** TRES of **CP** in the presence of DNA and **PI** in phosphate buffer (10 mM, 7.4) containing 2 mM NaCl monitored at (a) 2 ns and (b) 60 ns after excitation. [**CP**], 16  $\mu\text{M}$ ; [DNA], 27  $\mu\text{M}$ ; [**PI**], 3.8  $\mu\text{M}$ . Excitation wavelength, 375 nm.

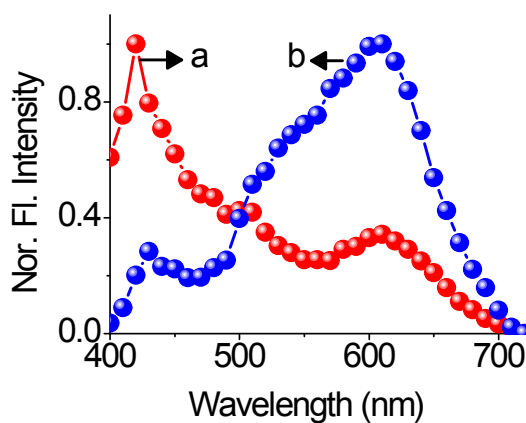

**Fig. S6** TRES of **CP** (16  $\mu\text{M}$ ) in the presence of DNA (27  $\mu\text{M}$ ) and **EHD** (3  $\mu\text{M}$ ) in phosphate buffer (10 mM, 7.4) containing 2 mM NaCl monitored at (a) 2 ns and (b) 50 ns after excitation. Excitation wavelength, 375 nm.

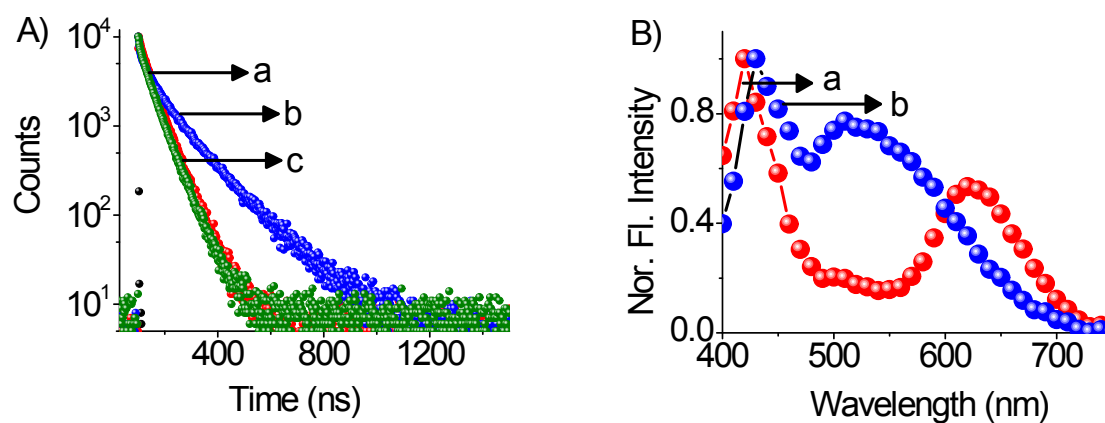

**Fig. S7** A) Fluorescence decay profiles of **CP** (a) alone, (b) in the presence of DNA and (c) in the presence of DNA and **EHD** when monitored at (a) 430 nm, (b) 570 nm and (c) 550 nm in phosphate buffer [**CP**], 16  $\mu\text{M}$ ; [**DNA**], 27  $\mu\text{M}$ ; [**EHD**], 15  $\mu\text{M}$ . Excitation wavelength, 375 nm. B) TRES of **CP** (16  $\mu\text{M}$ ) in the presence of DNA (27  $\mu\text{M}$ ) and **EHD** (15  $\mu\text{M}$ ) in phosphate buffer (10 mM, 7.4) containing 2 mM NaCl monitored at (a) 2 ns and (b) 50 ns after excitation. Excitation wavelength, 375 nm.
